# Supplementary material for: Color modulation of cerium sulfide colorant powders through chemical doping engineering
Source: Royal Society of Chemistry journal article supplement (doi:10.1039/d3tc00839h), 2023-01-01
Supplement: d3tc00839h1.pdf [file d3tc00839h1.pdf]

## Supplementary Materials for

### **Color modulation of cerium sulfide colorant powders through chemical doping engineering**

Hongbin Zhang,<sup>1</sup> Jiasong Zhang,<sup>2</sup> Renguang Ye,<sup>1\*</sup> Shiqing Xu,<sup>1</sup> Gongxun Bai<sup>1\*</sup>

<sup>1</sup> Key Laboratory of Rare Earth Optoelectronic Materials and Devices of Zhejiang Province, College of Optical and Electronic Technology, China Jiliang University, Hangzhou 310018, China.

<sup>2</sup> Hunan Kela Materials Co., Ltd, Changsha 410001, China.

E-mail address: baigx@cjlu.edu.cn (G. Bai), 15a0502098@cjlu.edu.cn (R. Ye)

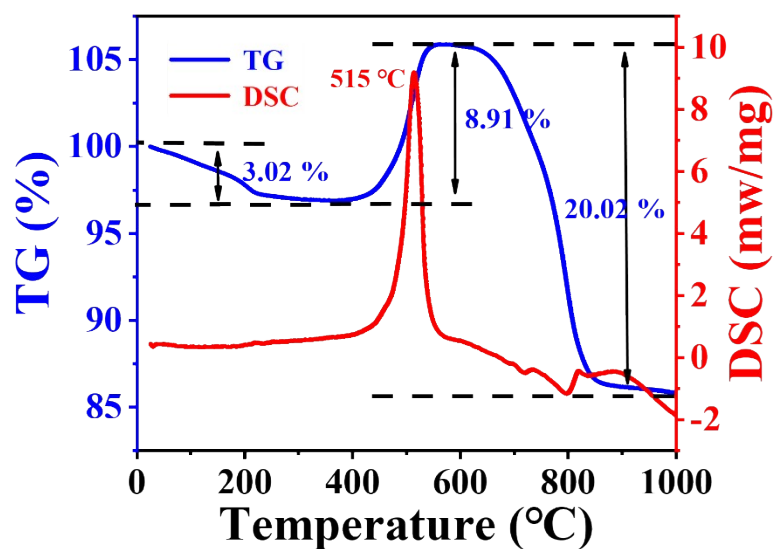

**Figure S1.** The Thermal stability analysis of core-shell  $\gamma$ - $\text{Ce}_2\text{S}_3$ @ZnO powder in the atmosphere.

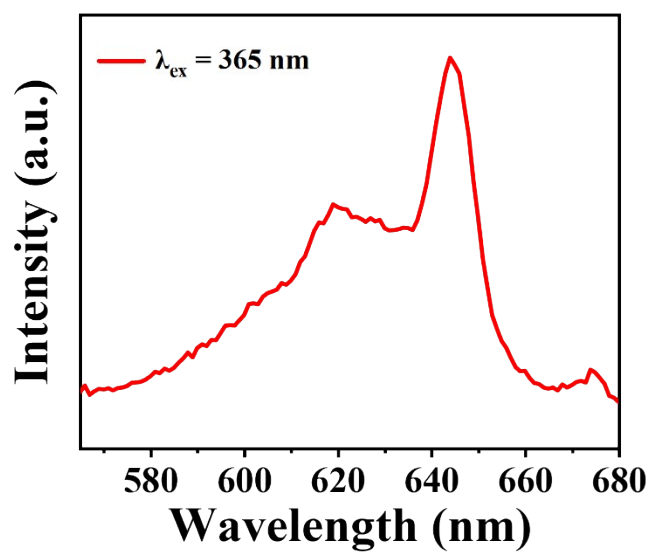

**Figure S2.** The emission spectrum of  $\gamma$ - $\text{Ce}_2\text{S}_3$  under 365 nm excitation.

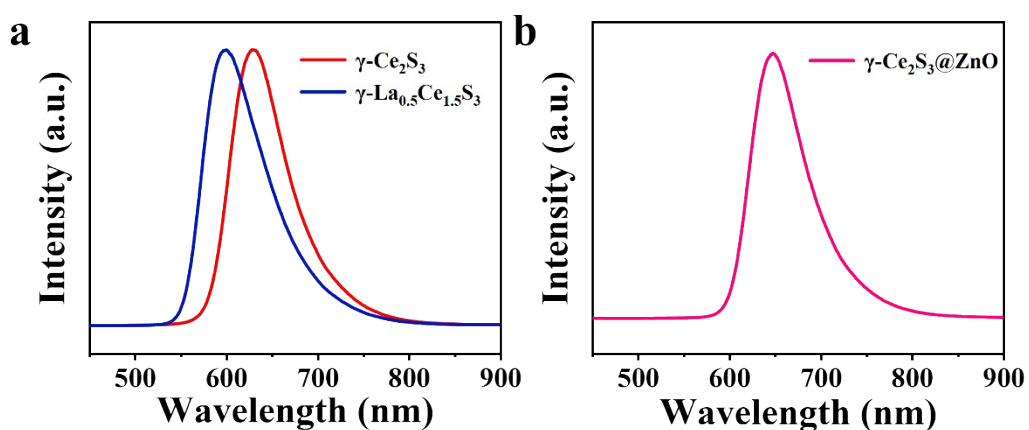

**Figure S3.** (a) The emission spectra of LED devices with  $\gamma\text{-La}_{0.5}\text{Ce}_{1.5}\text{S}_3$  colorant and  $\gamma\text{-Ce}_2\text{S}_3$  colorant. (b) The emission spectrum of LED device with  $\gamma\text{-Ce}_2\text{S}_3@\text{ZnO}$  colorant.

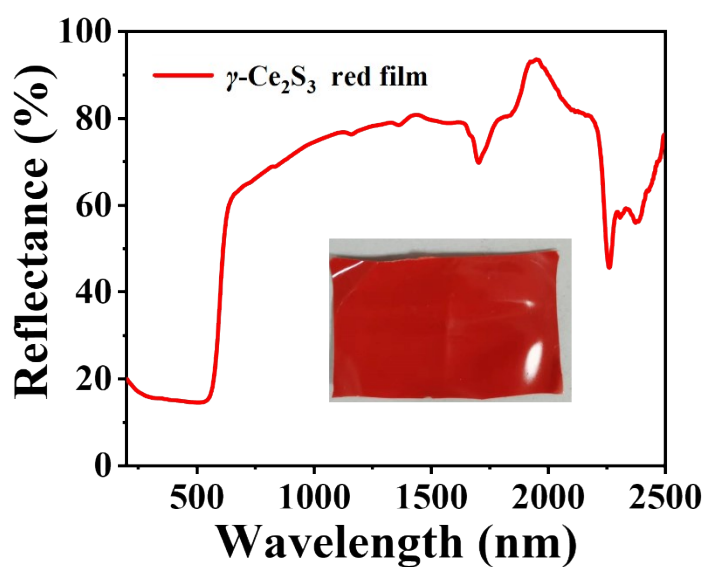

**Figure S4.** The reflectance spectra of red films in the range of 200-2500 nm. The inset shows a photo of the prepared red film.
